# Supplementary material for: Strategies of Elicitation to Enhance Bioactive Compound Content in Edible Plant Sprouts: A Bibliometric Study
Source: MDPI journal article supplement (doi:10.3390/plants10122759), 2021-12-14
Supplement: s1 [file s1]

# Strategies of Elicitation to Enhance Bioactive Compound Content in Edible Plant Sprouts: A Bibliometric Study

María-Trinidad Toro <sup>1</sup>, Jaime Ortiz <sup>2</sup>, José Becerra <sup>3</sup>, Nelson Zapata <sup>1</sup>, Paulo Fierro <sup>1</sup>, Marcelo Illanes <sup>1</sup> and María-Dolores López <sup>1,\*</sup>

## Supplementary Materials

**Table S1.** Main investigations of elicitation mechanisms in the synthesis of bioactive compounds in sprouts.

| Description                          | Results   |
|--------------------------------------|-----------|
| MAIN INFORMATION ABOUT DATA          |           |
| Timespan                             | 1992:2020 |
| Sources (Journals, Books, others)    | 246       |
| Documents                            | 787       |
| Average years from publication       | 6         |
| Average citations per documents      | 16.98     |
| Average citations per year per doc   | 2.076     |
| References                           | 26,166    |
| DOCUMENT TYPES                       |           |
| article                              | 722       |
| article; book chapter                | 7         |
| article; early access                | 1         |
| article; proceedings paper           | 10        |
| editorial material                   | 1         |
| meeting abstract                     | 1         |
| review                               | 37        |
| review; book chapter                 | 1         |
| DOCUMENT CONTENTS                    |           |
| Keywords Plus (ID)                   | 2,248     |
| Author's Keywords (DE)               | 2,228     |
| AUTHORS                              |           |
| Authors                              | 2,738     |
| Author Appearances                   | 3,576     |
| Authors of single-authored documents | 13        |
| Authors of multi-authored documents  | 2725      |
| AUTHORS COLLABORATION                |           |
| Single-authored documents            | 17        |
| Documents per Author                 | 0.287     |
| Authors per Document                 | 3.48      |
| Co-Authors per Documents             | 4.54      |
| Collaboration Index                  | 3.54      |

**Table S2.** The 246 journals that contain the articles extracted from the database.

| Nº | Sources                                    | Articles |
|----|--------------------------------------------|----------|
| 1  | JOURNAL OF AGRICULTURAL AND FOOD CHEMISTRY | 42       |
| 2  | FOOD CHEMISTRY                             | 39       |
| 3  | LWT-FOOD SCIENCE AND TECHNOLOGY            | 32       |

|    |                                                           |    |
|----|-----------------------------------------------------------|----|
| 4  | JOURNAL OF THE SCIENCE OF FOOD AND AGRICULTURE            | 30 |
| 5  | JOURNAL OF FOOD SCIENCE AND TECHNOLOGY-MYSORE             | 23 |
| 6  | INTERNATIONAL JOURNAL OF FOOD SCIENCE AND TECHNOLOGY      | 20 |
| 7  | MOLECULES                                                 | 19 |
| 8  | JOURNAL OF FOOD PROCESSING AND PRESERVATION               | 17 |
| 9  | SCIENTIA HORTICULTURAE                                    | 16 |
| 10 | FOOD SCIENCE AND BIOTECHNOLOGY                            | 15 |
| 11 | FOODS                                                     | 15 |
| 12 | FRONTIERS IN PLANT SCIENCE                                | 13 |
| 13 | JOURNAL OF FOOD BIOCHEMISTRY                              | 12 |
| 14 | ACTA PHYSIOLOGIAE PLANTARUM                               | 11 |
| 15 | CEREAL CHEMISTRY                                          | 10 |
| 16 | INTERNATIONAL JOURNAL OF MOLECULAR SCIENCES               | 10 |
| 17 | JOURNAL OF CEREAL SCIENCE                                 | 10 |
| 18 | JOURNAL OF FOOD MEASUREMENT AND CHARACTERIZATION          | 10 |
| 19 | JOURNAL OF FOOD SCIENCE                                   | 10 |
| 20 | JOURNAL OF PLANT PHYSIOLOGY                               | 10 |
| 21 | FOOD RESEARCH INTERNATIONAL                               | 9  |
| 22 | HORTSCIENCE                                               | 8  |
| 23 | JOURNAL OF FUNCTIONAL FOODS                               | 8  |
| 24 | AGRONOMY-BASEL                                            | 7  |
| 25 | ENVIRONMENTAL AND EXPERIMENTAL BOTANY                     | 7  |
| 26 | FOOD SCIENCE \& NUTRITION                                 | 7  |
| 27 | INDUSTRIAL CROPS AND PRODUCTS                             | 7  |
| 28 | BMC PLANT BIOLOGY                                         | 6  |
| 29 | TRENDS IN FOOD SCIENCE \& TECHNOLOGY                      | 6  |
| 30 | ACTA SCIENTIARUM POLONORUM-HORTORUM CULTUS                | 5  |
| 31 | EUROPEAN FOOD RESEARCH AND TECHNOLOGY                     | 5  |
| 32 | FOOD AND BIOPROCESS TECHNOLOGY                            | 5  |
| 33 | FOOD CONTROL                                              | 5  |
| 34 | HORTICULTURE ENVIRONMENT AND BIOTECHNOLOGY                | 5  |
| 35 | INTERNATIONAL FOOD RESEARCH JOURNAL                       | 5  |
| 36 | JOURNAL OF THE AMERICAN SOCIETY FOR HORTICULTURAL SCIENCE | 5  |
| 37 | PLANT BIOLOGY                                             | 5  |
| 38 | ANNALS OF BOTANY                                          | 4  |
| 39 | CEREAL RESEARCH COMMUNICATIONS                            | 4  |
| 40 | CYTA-JOURNAL OF FOOD                                      | 4  |
| 41 | FOOD \& FUNCTION                                          | 4  |
| 42 | FOOD BIOSCIENCE                                           | 4  |
| 43 | FOOD SCIENCE AND TECHNOLOGY                               | 4  |
| 44 | FOOD SCIENCE AND TECHNOLOGY INTERNATIONAL                 | 4  |
| 45 | HORTICULTURAE                                             | 4  |
| 46 | MOLECULAR NUTRITION \& FOOD RESEARCH                      | 4  |
| 47 | PLANT CELL AND ENVIRONMENT                                | 4  |
| 48 | PLANT GROWTH REGULATION                                   | 4  |
| 49 | PLANTS-BASEL                                              | 4  |
| 50 | PROCESS BIOCHEMISTRY                                      | 4  |
| 51 | SOUTH AFRICAN JOURNAL OF BOTANY                           | 4  |
| 52 | AUSTRALIAN JOURNAL OF BOTANY                              | 3  |
| 53 | FOOD SCIENCE AND TECHNOLOGY RESEARCH                      | 3  |
| 54 | GLUCOSINOLATES                                            | 3  |
| 55 | INTERNATIONAL JOURNAL OF FOOD PROPERTIES                  | 3  |
| 56 | JOURNAL OF CHEMISTRY                                      | 3  |

|     |                                                                |   |
|-----|----------------------------------------------------------------|---|
| 57  | JOURNAL OF ENVIRONMENTAL BIOLOGY                               | 3 |
| 58  | JOURNAL OF FOOD COMPOSITION AND ANALYSIS                       | 3 |
| 59  | JOURNAL OF FOOD PROCESS ENGINEERING                            | 3 |
| 60  | JOURNAL OF PROTEOMICS                                          | 3 |
| 61  | KOREAN JOURNAL FOR FOOD SCIENCE OF ANIMAL RESOURCES            | 3 |
| 62  | NOTULAE BOTANICAE HORTI AGROBOTANICI CLUJ-NAPOCA               | 3 |
| 63  | PLANT PHYSIOLOGY AND BIOCHEMISTRY                              | 3 |
| 64  | POSTHARVEST BIOLOGY AND TECHNOLOGY                             | 3 |
| 65  | SCIENTIFIC REPORTS                                             | 3 |
| 66  | AGRICULTURAL AND FOOD SCIENCE                                  | 2 |
| 67  | BIOLOGIA PLANTARUM                                             | 2 |
| 68  | BIOMED RESEARCH INTERNATIONAL                                  | 2 |
| 69  | BIOSCIENCE RESEARCH                                            | 2 |
| 70  | BOTANY                                                         | 2 |
| 71  | CURRENT RESEARCH IN NUTRITION AND FOOD SCIENCE                 | 2 |
| 72  | EUPHYTICA                                                      | 2 |
| 73  | FOOD BIOTECHNOLOGY                                             | 2 |
| 74  | FRESENIUS ENVIRONMENTAL BULLETIN                               | 2 |
| 75  | FUNCTIONAL FOODS IN HEALTH AND DISEASE                         | 2 |
| 76  | INTERNATIONAL JOURNAL OF PLANT SCIENCES                        | 2 |
| 77  | INVASIVE PLANT SCIENCE AND MANAGEMENT                          | 2 |
| 78  | ITALIAN JOURNAL OF AGRONOMY                                    | 2 |
| 79  | JOURNAL OF APPLIED RESEARCH ON MEDICINAL AND AROMATIC PLANTS   | 2 |
| 80  | JOURNAL OF CHROMATOGRAPHY A                                    | 2 |
| 81  | JOURNAL OF EXPERIMENTAL BOTANY                                 | 2 |
| 82  | JOURNAL OF FOOD QUALITY                                        | 2 |
| 83  | JOURNAL OF HORTICULTURAL SCIENCE \& BIOTECHNOLOGY              | 2 |
| 84  | JOURNAL OF INTEGRATIVE PLANT BIOLOGY                           | 2 |
| 85  | JOURNAL OF MICROBIOLOGY BIOTECHNOLOGY AND FOOD SCIENCES        | 2 |
| 86  | JOURNAL OF PHYTOPATHOLOGY                                      | 2 |
| 87  | JOURNAL OF PLANT NUTRITION                                     | 2 |
| 88  | NUTRITION \& FOOD SCIENCE                                      | 2 |
| 89  | PAKISTAN JOURNAL OF AGRICULTURAL SCIENCES                      | 2 |
| 90  | PAKISTAN JOURNAL OF BOTANY                                     | 2 |
| 91  | PHILIPPINE AGRICULTURAL SCIENTIST                              | 2 |
| 92  | PHYSIOLOGIA PLANTARUM                                          | 2 |
| 93  | PHYTOCHEMISTRY                                                 | 2 |
| 94  | PHYTON-ANNALES REI BOTANICAE                                   | 2 |
| 95  | PLANT FOODS FOR HUMAN NUTRITION                                | 2 |
| 96  | PLANT MOLECULAR BIOLOGY                                        | 2 |
| 97  | PLANTA                                                         | 2 |
| 98  | POLISH JOURNAL OF FOOD AND NUTRITION SCIENCES                  | 2 |
| 99  | QUALITY ASSURANCE AND SAFETY OF CROPS \& FOODS                 | 2 |
| 100 | RSC ADVANCES                                                   | 2 |
| 101 | SEED SCIENCE AND TECHNOLOGY                                    | 2 |
| 102 | SEED SCIENCE RESEARCH                                          | 2 |
| 103 | SPROUTED GRAINS: NUTRITIONAL VALUE PRODUCTION AND APPLICATIONS | 2 |
| 104 | UKRAINIAN FOOD JOURNAL                                         | 2 |
| 105 | ABSTRACTS OF PAPERS OF THE AMERICAN CHEMICAL SOCIETY           | 1 |
| 106 | ACTA ALIMENTARIA                                               | 1 |
| 107 | ACTA BIOLOGICA CRACOVIENSIS SERIES BOTANICA                    | 1 |
| 108 | ACTA BOTANICA BRASILICA                                        | 1 |
| 109 | ACTA SCIENTIARUM POLONORUM-TECHNOLOGIA ALIMENTARIA             | 1 |

|     |                                                                                   |   |
|-----|-----------------------------------------------------------------------------------|---|
| 110 | ACTA SOCIETATIS BOTANICORUM POLONIAE                                              | 1 |
| 111 | AFRICAN JOURNAL OF BIOTECHNOLOGY                                                  | 1 |
| 112 | AGRICULTURAL RESEARCH                                                             | 1 |
| 113 | AGRICULTURAL SYSTEMS                                                              | 1 |
| 114 | AGRICULTURE-BASEL                                                                 | 1 |
| 115 | AGRONOMY JOURNAL                                                                  | 1 |
| 116 | ALLELOPATHY JOURNAL                                                               | 1 |
| 117 | AMERICAN JOURNAL OF POTATO RESEARCH                                               | 1 |
| 118 | ANALYST                                                                           | 1 |
| 119 | ANALYTICAL BIOCHEMISTRY                                                           | 1 |
| 120 | ANALYTICAL CHEMISTRY                                                              | 1 |
| 121 | ANNALS OF AGRICULTURAL SCIENCE                                                    | 1 |
| 122 | ANNALS OF THE UNIVERSITY DUNAREA DE JOS OF GALATI FASCICLE VI-<br>FOOD TECHNOLOGY | 1 |
| 123 | APPLIED ECOLOGY AND ENVIRONMENTAL RESEARCH                                        | 1 |
| 124 | APPLIED FOOD BIOTECHNOLOGY                                                        | 1 |
| 125 | ARCHIVES OF AGRONOMY AND SOIL SCIENCE                                             | 1 |
| 126 | ASIA PACIFIC JOURNAL OF CLINICAL NUTRITION                                        | 1 |
| 127 | AUSTRALIAN JOURNAL OF EXPERIMENTAL AGRICULTURE                                    | 1 |
| 128 | AUSTRALIAN JOURNAL OF PLANT PHYSIOLOGY                                            | 1 |
| 129 | BIOCHIMIE                                                                         | 1 |
| 130 | BIOLOGIA                                                                          | 1 |
| 131 | BIOLOGIA FUTURA                                                                   | 1 |
| 132 | BIOORGANICHESKAYA KHIMIYA                                                         | 1 |
| 133 | BIORESOURCE TECHNOLOGY                                                            | 1 |
| 134 | BIOSCIENCE JOURNAL                                                                | 1 |
| 135 | BIOTECNIA                                                                         | 1 |
| 136 | BMC GENOMICS                                                                      | 1 |
| 137 | BOTANICAL SCIENCES                                                                | 1 |
| 138 | BOTANICAL STUDIES                                                                 | 1 |
| 139 | BRAZILIAN ARCHIVES OF BIOLOGY AND TECHNOLOGY                                      | 1 |
| 140 | CANADIAN JOURNAL OF PLANT SCIENCE                                                 | 1 |
| 141 | CARPATHIAN JOURNAL OF FOOD SCIENCE AND TECHNOLOGY                                 | 1 |
| 142 | CENTRAL EUROPEAN JOURNAL OF BIOLOGY                                               | 1 |
| 143 | CHEMISTRY CENTRAL JOURNAL                                                         | 1 |
| 144 | CIENCIA RURAL                                                                     | 1 |
| 145 | COGENT FOOD \& AGRICULTURE                                                        | 1 |
| 146 | CURRENT TOPICS IN NUTRACEUTICAL RESEARCH                                          | 1 |
| 147 | CZECH JOURNAL OF FOOD SCIENCES                                                    | 1 |
| 148 | EGYPTIAN JOURNAL OF BOTANY                                                        | 1 |
| 149 | EMIRATES JOURNAL OF FOOD AND AGRICULTURE                                          | 1 |
| 150 | ENVIRONMENTAL PROTECTION STRATEGIES FOR SUSTAINABLE DEVELOP-<br>MENT              | 1 |
| 151 | ENVIRONMENTAL SCIENCE AND POLLUTION RESEARCH                                      | 1 |
| 152 | EUROPEAN JOURNAL OF AGRONOMY                                                      | 1 |
| 153 | FOOD ANALYTICAL METHODS                                                           | 1 |
| 154 | FOOD AUSTRALIA                                                                    | 1 |
| 155 | FOOD ENGINEERING REVIEWS                                                          | 1 |
| 156 | FOOD PACKAGING AND SHELF LIFE                                                     | 1 |
| 157 | FOOD PROCESSING: METHODS TECHNIQUES AND TRENDS                                    | 1 |
| 158 | FOOD QUALITY AND SAFETY                                                           | 1 |
| 159 | FOOD SECURITY                                                                     | 1 |
| 160 | FOOD TECHNOLOGY AND BIOTECHNOLOGY                                                 | 1 |

|     |                                                                                                      |   |
|-----|------------------------------------------------------------------------------------------------------|---|
| 161 | FREE RADICAL RESEARCH                                                                                | 1 |
| 162 | FRUITS                                                                                               | 1 |
| 163 | GAYANA BOTANICA                                                                                      | 1 |
| 164 | GENETIC RESOURCES AND CROP EVOLUTION                                                                 | 1 |
| 165 | GRASAS Y ACEITES                                                                                     | 1 |
| 166 | INDIAN JOURNAL OF EXPERIMENTAL BIOLOGY                                                               | 1 |
| 167 | INDIAN JOURNAL OF TRADITIONAL KNOWLEDGE                                                              | 1 |
| 168 | INTERNATIONAL JOURNAL OF BIOLOGY AND CHEMISTRY                                                       | 1 |
| 169 | INTERNATIONAL JOURNAL OF FOOD SCIENCES AND NUTRITION                                                 | 1 |
| 170 | INTERNATIONAL JOURNAL OF GASTRONOMY AND FOOD SCIENCE                                                 | 1 |
| 171 | INTERNATIONAL JOURNAL OF PHYTOREMEDIATION                                                            | 1 |
| 172 | INTERNATIONAL JOURNAL OF PLANT PRODUCTION                                                            | 1 |
| 173 | ISRAEL JOURNAL OF PLANT SCIENCES                                                                     | 1 |
| 174 | JOURNAL INTERNATIONAL DES SCIENCES DE LA VIGNE ET DU VIN                                             | 1 |
| 175 | JOURNAL OF AGRICULTURAL SCIENCE AND TECHNOLOGY                                                       | 1 |
| 176 | JOURNAL OF AGRICULTURAL SCIENCES-TARIM BILIMLERI DERGISI                                             | 1 |
| 177 | JOURNAL OF ANALYTICAL METHODS IN CHEMISTRY                                                           | 1 |
| 178 | JOURNAL OF AOAC INTERNATIONAL                                                                        | 1 |
| 179 | JOURNAL OF APPLIED BOTANY AND FOOD QUALITY                                                           | 1 |
| 180 | JOURNAL OF BIOSCIENCES                                                                               | 1 |
| 181 | JOURNAL OF ESSENTIAL OIL RESEARCH                                                                    | 1 |
| 182 | JOURNAL OF FOOD AND NUTRITION RESEARCH                                                               | 1 |
| 183 | JOURNAL OF FOOD SCIENCE AND TECHNOLOGY-UKRAINE                                                       | 1 |
| 184 | JOURNAL OF FUNDAMENTAL AND APPLIED SCIENCES                                                          | 1 |
| 185 | JOURNAL OF INTEGRATIVE AGRICULTURE                                                                   | 1 |
| 186 | JOURNAL OF OLEO SCIENCE                                                                              | 1 |
| 187 | JOURNAL OF PLANT BIOCHEMISTRY AND BIOTECHNOLOGY                                                      | 1 |
| 188 | JOURNAL OF PLANT BIOLOGY                                                                             | 1 |
| 189 | JOURNAL OF PLANT GROWTH REGULATION                                                                   | 1 |
| 190 | JOURNAL OF TEXTURE STUDIES                                                                           | 1 |
| 191 | JOURNAL OF THE CHILEAN CHEMICAL SOCIETY                                                              | 1 |
| 192 | JOURNAL OF THE CHINESE INSTITUTE OF ENGINEERS                                                        | 1 |
| 193 | JOURNAL OF THE JAPANESE SOCIETY FOR FOOD SCIENCE AND TECHNOLOGY-NIPPON SHOKUHIN KAGAKU KOGAKU KAISHI | 1 |
| 194 | JOURNAL OF ZHEJIANG UNIVERSITY-SCIENCE B                                                             | 1 |
| 195 | KOREAN JOURNAL OF HORTICULTURAL SCIENCE \& TECHNOLOGY                                                | 1 |
| 196 | KVASNY PRUMYSL                                                                                       | 1 |
| 197 | LEGUME RESEARCH                                                                                      | 1 |
| 198 | MEAT SCIENCE                                                                                         | 1 |
| 199 | MOLECULAR \& CELLULAR PROTEOMICS                                                                     | 1 |
| 200 | MOLECULAR PLANT PATHOLOGY                                                                            | 1 |
| 201 | NUSANTARA BIOSCIENCE                                                                                 | 1 |
| 202 | NUTRIENTS                                                                                            | 1 |
| 203 | OXIDATIVE MEDICINE AND CELLULAR LONGEVITY                                                            | 1 |
| 204 | PEERJ                                                                                                | 1 |
| 205 | PESQUISA AGROPECUARIA BRASILEIRA                                                                     | 1 |
| 206 | PHILIPPINE JOURNAL OF CROP SCIENCE                                                                   | 1 |
| 207 | PHILOSOPHICAL TRANSACTIONS OF THE ROYAL SOCIETY B-BIOLOGICAL SCIENCES                                | 1 |
| 208 | PHOTOSYNTHETICA                                                                                      | 1 |
| 209 | PHYSIOLOGY AND MOLECULAR BIOLOGY OF PLANTS                                                           | 1 |
| 210 | PHYSIOLOGY INTERNATIONAL                                                                             | 1 |
| 211 | PHYTON-INTERNATIONAL JOURNAL OF EXPERIMENTAL BOTANY                                                  | 1 |

|     |                                                                                 |   |
|-----|---------------------------------------------------------------------------------|---|
| 212 | PHYTOPATHOLOGY                                                                  | 1 |
| 213 | PLANT AND SOIL                                                                  | 1 |
| 214 | PLANT BREEDING                                                                  | 1 |
| 215 | PLANT CELL TISSUE AND ORGAN CULTURE                                             | 1 |
| 216 | PLANT JOURNAL                                                                   | 1 |
| 217 | PLANT METHODS                                                                   | 1 |
| 218 | PLANT PHYSIOLOGY                                                                | 1 |
| 219 | PLANT SCIENCE TODAY                                                             | 1 |
| 220 | PLOS ONE                                                                        | 1 |
| 221 | POLISH JOURNAL OF ENVIRONMENTAL STUDIES                                         | 1 |
| 222 | POTATO RESEARCH                                                                 | 1 |
| 223 | PROCEEDINGS OF THE NATIONAL ACADEMY OF SCIENCES OF THE UNITED STATES OF AMERICA | 1 |
| 224 | PROCESSES                                                                       | 1 |
| 225 | PROTEOME SCIENCE                                                                | 1 |
| 226 | PROTEOMICS                                                                      | 1 |
| 227 | QUIMICA NOVA                                                                    | 1 |
| 228 | RESEARCH JOURNAL OF BIOTECHNOLOGY                                               | 1 |
| 229 | REVISTA BRASILEIRA DE CIENCIA DO SOLO                                           | 1 |
| 230 | REVISTA BRASILEIRA DE CIENCIAS AGRARIAS-AGRARIA                                 | 1 |
| 231 | REVISTA BRASILEIRA DE FRUTICULTURA                                              | 1 |
| 232 | REVISTA DE BIOLOGIA TROPICAL                                                    | 1 |
| 233 | REVISTA DE LA FACULTAD DE AGRONOMIA DE LA UNIVERSIDAD DEL ZULIA                 | 1 |
| 234 | REVISTA DE LA FACULTAD DE CIENCIAS AGRARIAS                                     | 1 |
| 235 | REVISTA MEXICANA DE INGENIERIA QUIMICA                                          | 1 |
| 236 | REVISTA VIRTUAL DE QUIMICA                                                      | 1 |
| 237 | RICE SCIENCE                                                                    | 1 |
| 238 | ROMANIAN BIOTECHNOLOGICAL LETTERS                                               | 1 |
| 239 | RUSSIAN JOURNAL OF PLANT PHYSIOLOGY                                             | 1 |
| 240 | SCIENCE OF THE TOTAL ENVIRONMENT                                                | 1 |
| 241 | SEMINA-CIENCIAS AGRARIAS                                                        | 1 |
| 242 | SOIL SCIENCE                                                                    | 1 |
| 243 | SOUTH AFRICAN JOURNAL OF ENOLOGY AND VITICULTURE                                | 1 |
| 244 | SWEET POTATO: POST HARVEST ASPECTS IN FOOD FEED AND INDUSTRY                    | 1 |
| 245 | TROPICAL PLANT BIOLOGY                                                          | 1 |
| 246 | ZEMDIRBYSTE-AGRICULTURE                                                         | 1 |

**Table S3.** The top 50 author keywords found in the highest number of articles.

| N°<br>keywords | Author Keywords      | Frequency | %  |
|----------------|----------------------|-----------|----|
| 1              | germination          | 142       | 14 |
| 2              | antioxidant activity | 84        | 8  |
| 3              | antioxidant          | 53        | 5  |
| 4              | glucosinolates       | 48        | 5  |
| 5              | sprouts              | 45        | 4  |
| 6              | phenolics            | 36        | 4  |
| 7              | phenolic compounds   | 33        | 3  |
| 8              | elicitation          | 27        | 3  |
| 9              | antioxidants         | 25        | 2  |
| 10             | sprouting            | 23        | 2  |

|    |                          |    |   |
|----|--------------------------|----|---|
| 11 | antioxidant capacity     | 22 | 2 |
| 12 | phytochemicals           | 22 | 2 |
| 13 | soybean                  | 22 | 2 |
| 14 | flavonoids               | 20 | 2 |
| 15 | glucosinolate            | 19 | 2 |
| 16 | broccoli sprouts         | 18 | 2 |
| 17 | seed germination         | 18 | 2 |
| 18 | activity                 | 17 | 2 |
| 19 | sulforaphane             | 17 | 2 |
| 20 | broccoli                 | 16 | 2 |
| 21 | phenolic                 | 15 | 1 |
| 22 | myrosinase               | 14 | 1 |
| 23 | bioactive compounds      | 13 | 1 |
| 24 | polyphenols              | 13 | 1 |
| 25 | sprout                   | 13 | 1 |
| 26 | antioxidant enzymes      | 12 | 1 |
| 27 | seed                     | 12 | 1 |
| 28 | yield                    | 12 | 1 |
| 29 | elicitors                | 11 | 1 |
| 30 | gamma-aminobutyric acid  | 11 | 1 |
| 31 | methyl jasmonate         | 11 | 1 |
| 32 | phytic acid              | 11 | 1 |
| 33 | <i>brassica oleracea</i> | 10 | 1 |
| 34 | gene expression          | 10 | 1 |
| 35 | metabolomics             | 10 | 1 |
| 36 | rice                     | 10 | 1 |
| 37 | wheat                    | 10 | 1 |
| 38 | brown rice               | 9  | 1 |
| 39 | carotenoids              | 9  | 1 |
| 40 | fermentation             | 9  | 1 |
| 41 | legumes                  | 9  | 1 |
| 42 | light                    | 9  | 1 |
| 43 | phytochemical            | 9  | 1 |
| 44 | properties               | 9  | 1 |
| 45 | selenium                 | 9  | 1 |
| 46 | soaking                  | 9  | 1 |
| 47 | tartary buckwheat        | 9  | 1 |
| 48 | anthocyanin              | 8  | 1 |
| 49 | bioaccessibility         | 8  | 1 |
| 50 | compounds                | 8  | 1 |

**Table S4.** The most productive countries concerning publications on elicitation in sprouts.

| Rank | Country | Articles | Frequency (%) | SCP | MCP | MCP Ratio (%) |
|------|---------|----------|---------------|-----|-----|---------------|
| 1    | China   | 150      | 0.1931        | 125 | 25  | 0.1667        |
| 2    | India   | 85       | 0.1094        | 78  | 7   | 0.0824        |
| 3    | USA     | 60       | 0.0772        | 49  | 11  | 0.1833        |
| 4    | Korea   | 58       | 0.0746        | 50  | 8   | 0.1379        |
| 5    | Poland  | 43       | 0.0553        | 40  | 3   | 0.0698        |
| 6    | Spain   | 40       | 0.0515        | 26  | 14  | 0.3500        |

|    |          |    |        |    |    |        |
|----|----------|----|--------|----|----|--------|
| 7  | Italy    | 39 | 0.0502 | 27 | 12 | 0.3077 |
| 8  | Mexico   | 27 | 0.0347 | 22 | 5  | 0.1852 |
| 9  | Brazil   | 24 | 0.0309 | 22 | 2  | 0.0833 |
| 10 | Thailand | 24 | 0.0309 | 18 | 6  | 0.2500 |

Freq: Frequency; SCP: Single Country Publications; MCP: Multiple Country Publications.

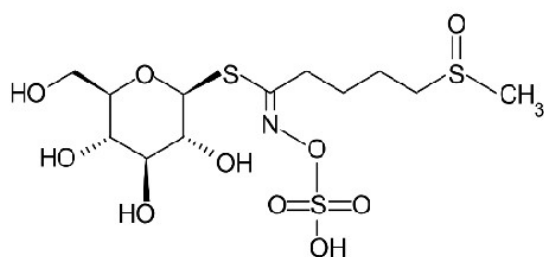

Glucoraphanin

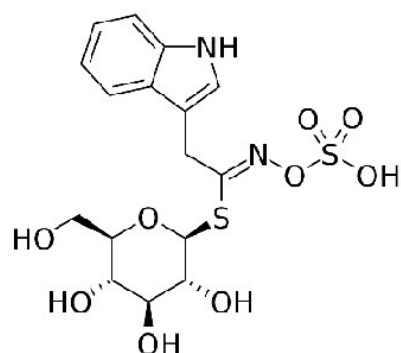

Glucobrassicin

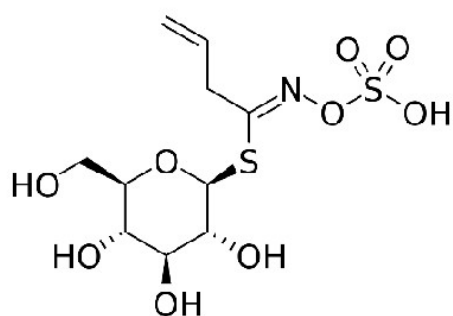

Sinigrin

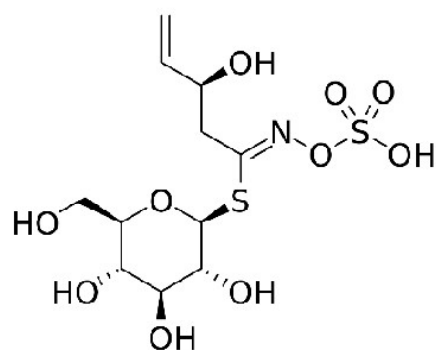

Progoitrin

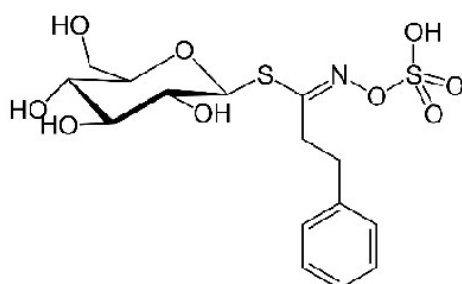

Gluconasturtiin

**Figure S1.** Chemical structures of the main glucosinolates.
